# Supplementary material for: Symbolic universes between present and future of Europe. First results of the map of European societies' cultural milieu
Source: PLOS journal article supplement (doi:10.1371/journal.pone.0189885), 2018-01-03
Supplement: S3 (10.1371/journal.pone.0189885.s003) [file journal.pone.0189885.s003]

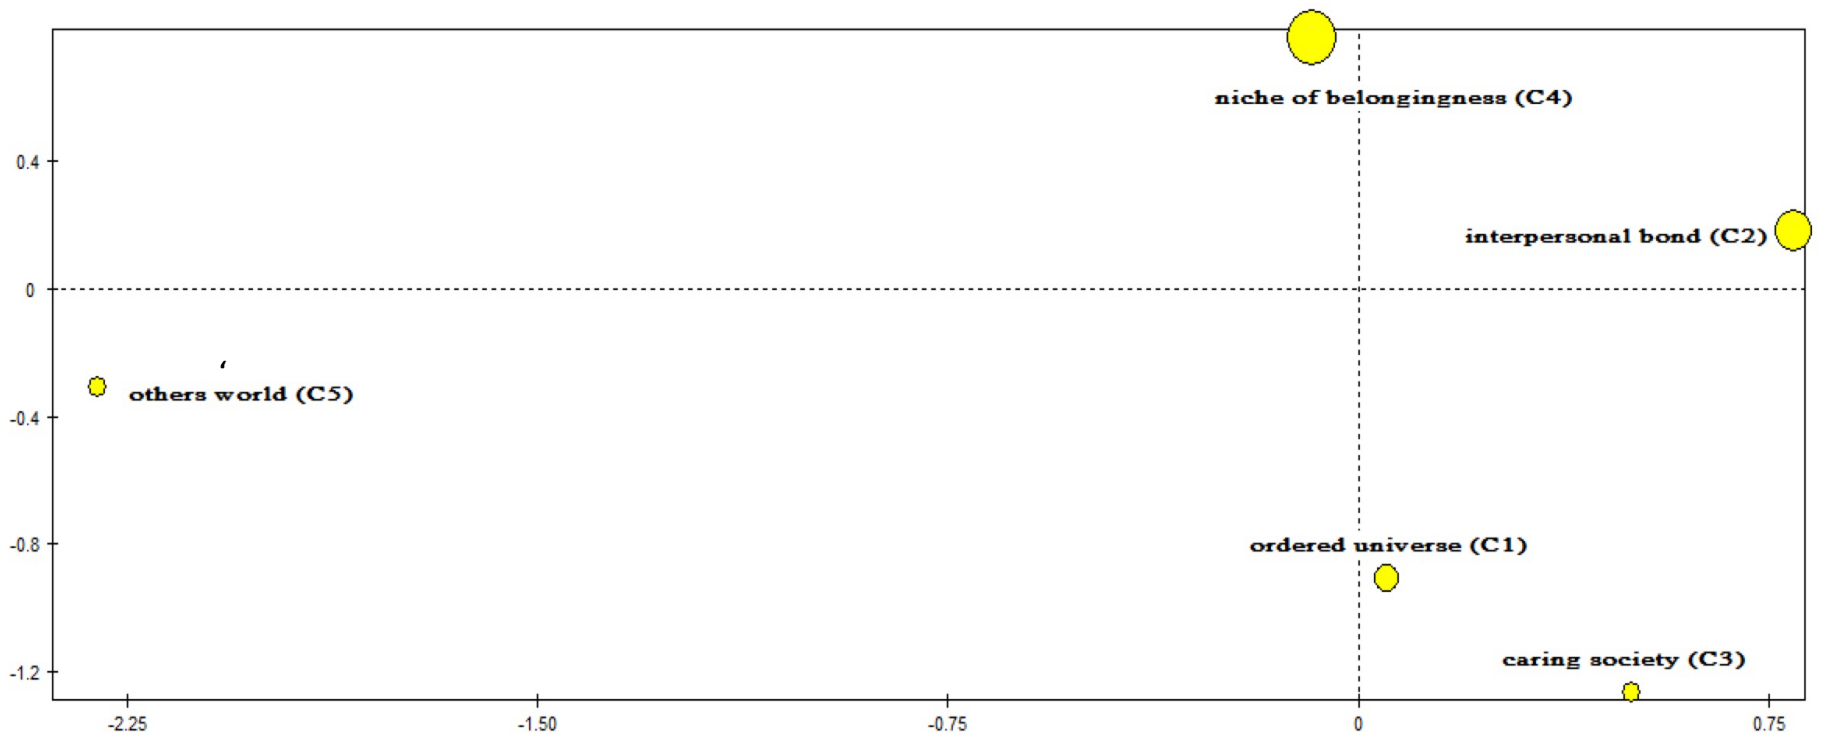

S1 Fig. Position of the symbolic universes on the MCA main factorial dimensions.  
Factor 1 vs. Factor 2

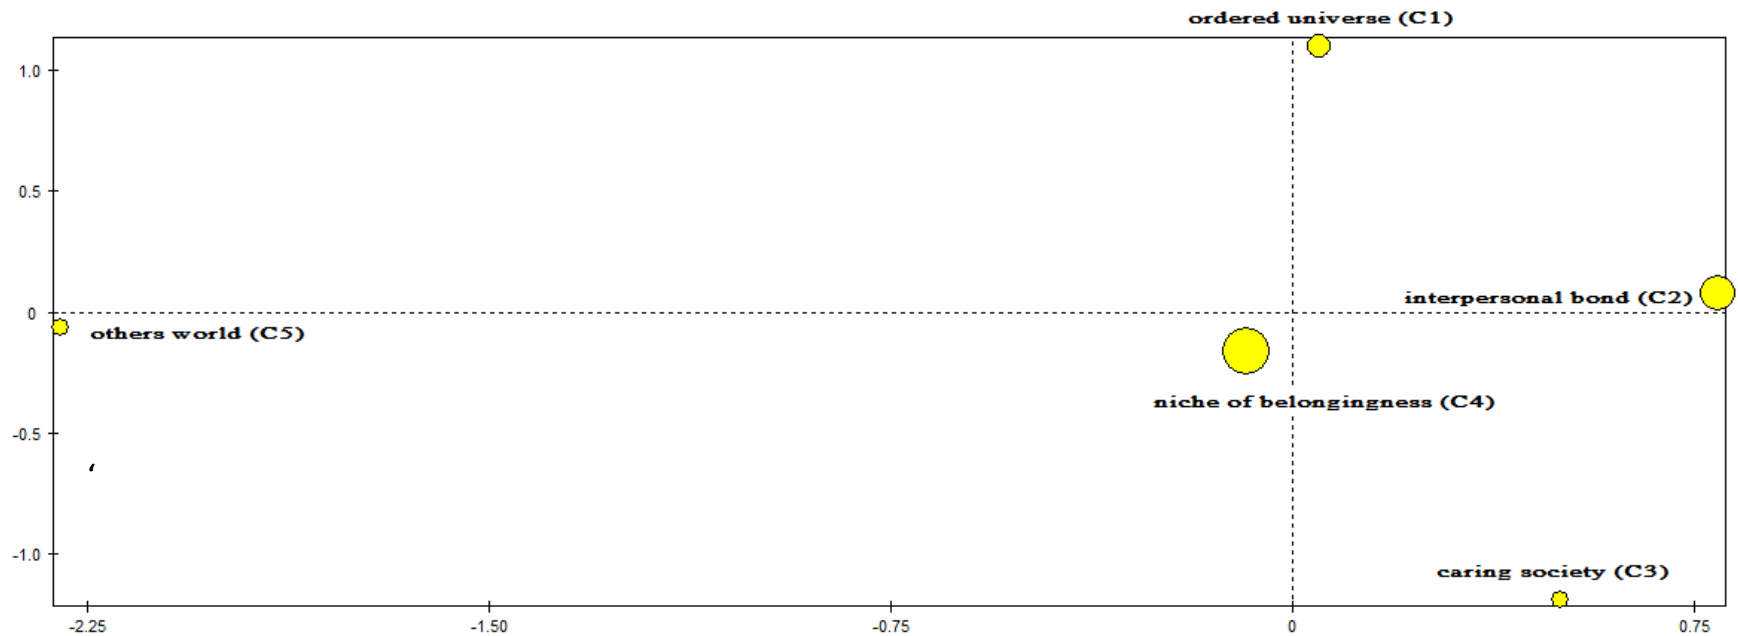

S2 Fig. Position of the symbolic universes on the MCA main factorial dimensions.  
Factor 1 vs. Factor 3
